# Supplementary material for: Network based statistics reveals trophic and neuroprotective effect of early high dose erythropoetin on brain connectivity in very preterm infants
Source: PubMed Central journal article supplement — Neuroimage Clin. 2019 Apr 1;22:101806. doi: 10.1016/j.nicl.2019.101806 (PMC6451173; doi:10.1016/j.nicl.2019.101806), 2019-04-01
Supplement: mmc1.pdf [file mmc1.pdf]

**Supplementary Table 1. Region of interest abbreviations and locations.**

| Name of region                                    | Short     | Lobe / region | COG,<br>x | COG,<br>y | COG,<br>z |
|---------------------------------------------------|-----------|---------------|-----------|-----------|-----------|
| Left precentral gyrus                             | PreC_L    | Frontal       | 24.5      | -7.0      | 37.3      |
| Right precentral gyrus                            | PreC_R    | Frontal       | -21.3     | -9.9      | 38.4      |
| Left superior frontal gyrus, dorsolateral         | F-su_L    | Frontal       | 11.9      | 15.9      | 31.4      |
| Right superior frontal gyrus, dorsolateral        | F-su_R    | Frontal       | -9.9      | 12.3      | 33.4      |
| Left superior frontal gyrus, orbital part         | F-so_L    | Frontal       | 9.9       | 22.6      | -5.4      |
| Right superior frontal gyrus, orbital part        | F-so_R    | Frontal       | -7.5      | 19.5      | -6.2      |
| Left middle frontal gyrus, lateral part           | F-mid_L   | Frontal       | 20.1      | 17.1      | 26.7      |
| Right middle frontal gyrus, lateral part          | F-mid_R   | Frontal       | -18.5     | 16.9      | 25.3      |
| Left middle frontal gyrus, orbital part           | F-mo_L    | Frontal       | 17.6      | 26.1      | -2.1      |
| Right middle frontal gyrus, orbital part          | F-mo_R    | Frontal       | -14.6     | 26.2      | -3.4      |
| Left opercular part of inferior frontal gyrus     | F-io_L    | Frontal       | 28.1      | 3.5       | 19.4      |
| Right opercular part of inferior frontal gyrus    | F-io_R    | Frontal       | -26.1     | 3.6       | 19.9      |
| Left area triangularis                            | F-it_L    | Frontal       | 27.6      | 15.1      | 15.1      |
| Right area triangularis                           | F-it_R    | Frontal       | -25.8     | 13.5      | 13.4      |
| Left orbital part of inferior frontal gyrus       | F-iorb_L  | Frontal       | 20.8      | 13.4      | -1.6      |
| Right orbital part of inferior frontal gyrus      | F-iorb_R  | Frontal       | -19.8     | 13.0      | -1.9      |
| Left rolandic operculum                           | PC-oper_L | Parietal      | 28.2      | -11.8     | 19.5      |
| Right rolandic operculum                          | PC-oper_R | Parietal      | -27.5     | -12.9     | 18.1      |
| Left supplementary motor area                     | SMA_L     | Frontal       | 5.5       | -3.9      | 44.2      |
| Right supplementary motor area                    | SMA_R     | Frontal       | -3.8      | -5.9      | 42.4      |
| Left olfactory cortex                             | OL_L      | Frontal       | 6.6       | 2.0       | -0.8      |
| Right olfactory cortex                            | OL_R      | Frontal       | -4.0      | 1.6       | -1.3      |
| Left superior frontal gyrus, medial part          | FSM_L     | Frontal       | 5.1       | 24.6      | 23.8      |
| Right superior frontal gyrus, medial part         | FSM_R     | Frontal       | -3.5      | 25.8      | 22.8      |
| Left superior frontal gyrus, medial orbital part  | FMO_L     | Frontal       | 3.6       | 25.4      | -2.6      |
| Right superior frontal gyrus, medial orbital part | FMO_R     | Frontal       | -2.9      | 22.2      | -1.2      |
| Left gyrus rectus                                 | Rec_L     | Frontal       | 4.9       | 16.1      | -7.6      |

|                                 |         |                    |       |       |      |
|---------------------------------|---------|--------------------|-------|-------|------|
| Right gyrus rectus              | Rec_R   | Frontal            | -3.2  | 13.6  | -7.3 |
| Left insula                     | Ins_L   | Subcortical/insula | 22.2  | -3.1  | 10.0 |
| Right insula                    | Ins_R   | Subcortical/insula | -20.0 | -5.0  | 9.1  |
| Left anterior cingulate gyrus   | CingA_L | Limbic             | 4.6   | 15.7  | 14.2 |
| Right anterior cingulate gyrus  | CingA_R | Limbic             | -3.7  | 17.4  | 15.0 |
| Left middle cingulate           | CingM_L | Limbic             | 5.7   | -14.1 | 32.8 |
| Right middle cingulate          | CingM_R | Limbic             | -3.8  | -11.4 | 30.6 |
| Left posterior cingulate gyrus  | CingP_L | Limbic             | 5.2   | -33.4 | 22.2 |
| Right posterior cingulate gyrus | CingP_R | Limbic             | -3.0  | -34.7 | 20.1 |
| Left hippocampus                | HC_L    | Temporal           | 16.1  | -20.4 | 1.5  |
| Right hippocampus               | HC_R    | Temporal           | -13.8 | -22.2 | 1.4  |
| Left parahippocampal gyrus      | PH_L    | Temporal           | 13.3  | -17.8 | -6.6 |
| Right parahippocampal gyrus     | PH_R    | Temporal           | -10.7 | -19.6 | -6.5 |
| Left amygdala                   | Am_L    | Limbic             | 15.8  | -8.3  | -4.1 |
| Right amygdala                  | Am_R    | Limbic             | -13.4 | -9.9  | -5.0 |
| Left calcarine sulcus           | Cal_L   | Occipital          | 9.9   | -54.9 | 12.7 |
| Right calcarine sulcus          | Cal_R   | Occipital          | -5.8  | -55.5 | 13.1 |
| Left cuneus                     | Cun_L   | Occipital          | 8.6   | -57.6 | 25.5 |
| Right cuneus                    | Cun_R   | Occipital          | -3.4  | -58.8 | 26.6 |
| Left lingual gyrus              | Lin_L   | Occipital          | 11.1  | -49.5 | 3.8  |
| Right lingual gyrus             | Lin_R   | Occipital          | -4.8  | -52.5 | 2.7  |
| Left superior occipital         | O-s_L   | Occipital          | 15.5  | -60.4 | 26.7 |
| Right superior occipital        | O-s_R   | Occipital          | -8.0  | -61.5 | 26.7 |
| Left middle occipital           | O-m_L   | Occipital          | 23.4  | -56.9 | 19.8 |
| Right middle occipital          | O-m_R   | Occipital          | -15.7 | -62.8 | 19.9 |
| Left inferior occipital         | O-i_L   | Occipital          | 26.3  | -55.8 | 2.8  |
| Right inferior occipital        | O-i_R   | Occipital          | -15.9 | -65.3 | 0.7  |
| Left fusiform gyrus             | Fus_L   | Occipital          | 20.6  | -34.9 | -4.4 |
| Right fusiform gyrus            | Fus_R   | Occipital          | -15.5 | -37.6 | -4.9 |
| Left postcentral gyrus          | PC_L    | Parietal           | 27.0  | -16.2 | 37.4 |
| Right postcentral gyrus         | PC_R    | Parietal           | -22.4 | -19.7 | 38.7 |
| Left superior parietal lobule   | PS_L    | Parietal           | 16.6  | -39.4 | 47.5 |
| Right superior parietal lobule  | PS_R    | Parietal           | -10.7 | -41.9 | 48.7 |
| Left inferior parietal lobule   | PI_L    | Parietal           | 27.0  | -31.4 | 40.9 |
| Right inferior parietal lobule  | PI_R    | Parietal           | -22.7 | -35.4 | 40.5 |

|                                |        |                    |       |       |       |
|--------------------------------|--------|--------------------|-------|-------|-------|
| Left supramarginal gyrus       | SM_L   | Parietal           | 35.1  | -23.8 | 31.2  |
| Right supramarginal gyrus      | SM_R   | Parietal           | -31.3 | -27.1 | 31.1  |
| Left angular gyrus             | An_L   | Parietal           | 29.2  | -42.1 | 34.4  |
| Right angular gyrus            | An_R   | Parietal           | -21.6 | -47.8 | 34.8  |
| Left precuneus                 | Pcun_L | Parietal           | 7.1   | -40.5 | 38.7  |
| Right precuneus                | Pcun_R | Parietal           | -4.3  | -40.4 | 35.0  |
| Left paracentral lobule        | ParC_L | Parietal           | 5.7   | -21.3 | 48.8  |
| Right paracentral lobule       | ParC_R | Parietal           | -4.1  | -24.2 | 46.6  |
| Left caudate nucleus           | Ca_L   | Subcortical/insula | 8.8   | 0.7   | 13.8  |
| Right caudate nucleus          | Ca_R   | Subcortical/insula | -7.6  | 0.0   | 13.9  |
| Left putamen                   | Pu_L   | Subcortical/insula | 15.4  | -3.7  | 10.1  |
| Right putamen                  | Pu_R   | Subcortical/insula | -14.0 | -5.2  | 9.3   |
| Left globus pallidus           | Pa_L   | Subcortical/insula | 11.9  | -8.0  | 9.3   |
| Right globus pallidus          | Pa_R   | Subcortical/insula | -9.9  | -9.2  | 8.1   |
| Left thalamus                  | Th_L   | Subcortical/insula | 8.1   | -17.1 | 13.5  |
| Right thalamus                 | Th_R   | Subcortical/insula | -6.4  | -18.7 | 13.5  |
| Left transverse temporal gyri  | HG_L   | Temporal           | 24.9  | -19.4 | 16.1  |
| Right transverse temporal gyri | HG_R   | Temporal           | -22.6 | -22.1 | 15.3  |
| Left superior temporal gyrus   | TS_L   | Temporal           | 32.7  | -18.0 | 14.6  |
| Right superior temporal gyrus  | TS_R   | Temporal           | -30.1 | -23.7 | 13.4  |
| Left superior temporal pole    | TPS_L  | Temporal           | 24.9  | 0.6   | -5.1  |
| Right superior temporal pole   | TPS_R  | Temporal           | -23.5 | -1.5  | -5.1  |
| Left middle temporal gyrus     | TM_L   | Temporal           | 32.5  | -30.4 | 10.8  |
| Right middle temporal gyrus    | TM_R   | Temporal           | -28.4 | -38.9 | 9.8   |
| Left middle temporal pole      | TPM_L  | Temporal           | 23.3  | 0.9   | -14.0 |
| Right middle temporal pole     | TPM_R  | Temporal           | -21.7 | -1.6  | -13.9 |
| Left inferior temporal gyrus   | TI_L   | Temporal           | 29.3  | -24.1 | -7.5  |
| Right inferior temporal gyrus  | TI_R   | Temporal           | -25.7 | -31.6 | -7.0  |
